# Supplementary material
Source: PubMed Central journal article supplement (PMC3345568)
Supplement: NIHMS364107-supplement-NIHMS364107.pdf [file NIHMS364107-supplement-NIHMS364107.pdf]

## Supplementary Materials for

### Human T<sub>H</sub>17 Cells Are Long-Lived Effector Memory Cells

Ilona Kryczek, Ende Zhao, Yan Liu, Yin Wang, Linhua Vatan, Wojciech Szeliga, Jeffrey Moyer, Aleksandra Klimczak, Andrzej Lange, Weiping Zou\*

\*To whom correspondence should be addressed. E-mail: wzou@med.umich.edu

Published 12 October 2011, *Sci. Transl. Med.* **3**, 104ra100 (2011)

DOI: 10.1126/scitranslmed.3002949

#### The PDF file includes:

##### Materials and Methods

Fig. S1. T<sub>H</sub>17 cells in different tissues/organs.

Fig. S2. Flow-based gating for primary T<sub>H</sub> cell subsets.

Fig. S3. Cytokine profile of primary T<sub>H</sub>17 cells.

Fig. S4. Flow-based gating and sorting for T<sub>H</sub>17 cells.

Fig. S5. Polarized T cell subsets.

Fig. S6. T<sub>H</sub>17 cells express high levels of stem cell genes.

Fig. S7. Effects of IL-6 and IL-23 on T<sub>H</sub>17 cell apoptosis.

Fig. S8. HIF-1 blockade with echinomycin and shHIF-1 $\alpha$ .

Fig. S9. The HIF-1 inhibitor echinomycin had no effects on the human *IFNG* and *CD3* expression in vivo.

Fig. S10. Notch-IC activated Notch signaling gene expression.

References

# Materials and Methods

## Human subjects and human tissues

We studied healthy humans and patients with GvHD after bone marrow transplantation, chronic ulcerative colitis, colitic-associated colon carcinoma and ovarian cancer. Human tissues were from patients presenting for diagnostic biopsy, prophylactic colectomy, or tumor debulking. Patients received no prior treatment with immunosuppressive or chemotherapeutic agents were recruited for this study. Patients gave written, informed consent. Cells and tissues were obtained from blood and human tissues as we described (1, 2). The study was approved by the local Institutional Review Boards. In all the paired studies, different cell subsets utilized were autologous throughout this work, unless specifically described.

## Flow cytometry analysis

The cells were first stained extracellularly with specific antibodies against surface antigens, then were fixed and permeabilized with Perm/Fix solution, and finally were stained intracellularly with antibodies to Ki67, caspase 3, or cytokines (BD Biosciences). Samples were acquired on a LSR II (BD) and data were analyzed with DIVA software (BD Biosciences).

## Primary T helper (T<sub>H</sub>) subsets and T<sub>H</sub> polarization

T<sub>H</sub> signature cytokines: Primary T<sub>H</sub> subsets or polarized T<sub>H</sub> subsets were defined on the basis of surface phenotype and specific T<sub>H</sub> signature cytokine profile with multiple color flow cytometry analysis (LSR II, BD). All the flow-based phenotype, cytokine profile, proliferation, and survival/apoptosis markers were analyzed with this phenotype definition.

Primary T<sub>H</sub>17 cells were initially enriched with magnetic beads and sorted with high speed sorter (FACS Aria) with the phenotype of CD3<sup>+</sup>CD4<sup>+</sup>CD45RA<sup>-</sup>CD45RO<sup>+</sup>CCR6<sup>+</sup>CD161<sup>+</sup> (3-5) to high purity (99%) and defined with RORγt and IL-17 expression. For *in vivo* functional experiments, primary T<sub>H</sub>17 cells were maintained and activated for 72 hours with 2 ng/ml IL-1β, 2 ng/ml IL-23 and 2 μg/ml of anti-IL-4 and anti-IFNγ neutralizing antibodies.

T<sub>H</sub> polarization: Naïve CD4<sup>+</sup> T cells were stimulated with 2.5 μg/mL anti-CD3 and 1.25 μg/mL anti-CD28 mAb and 3 ng/ml rhIL-2 in the presence of irradiated peripheral blood

mononuclear cells. 10 ng/ml IL-12 and 2 µg/ml of anti-IL-4 or 5 ng/ml IL-4 and 2 µg/ml anti-IFN $\gamma$  or 5 ng/ml IL-2 plus 10 ng/ml TGF $\beta$  or 2 ng/ml IL-1 $\beta$ , 5 ng/ml IL-23 and 2 µg/ml of anti-IL-4 and anti-IFN $\gamma$  neutralizing antibodies were added for T<sub>H</sub>1 or T<sub>H</sub>2 or T<sub>reg</sub> or T<sub>H</sub>17 polarization, respectively.

### **Immunohistochemistry**

Immunohistochemistry analysis was performed as described (1, 2). For multiple color fluorescence staining, tissues were stained with polyclonal rabbit anti-human-CD3 and polyclonal goat anti-human IL-17 followed by donkey anti-rabbit Alexa Fluor 568 (red) or chicken anti-rabbit Alexa Fluor 488 (green) and/or donkey anti-goat Alexa Fluor 488 (green) conjugated antibodies (all from Invitrogen). For classic immunohistochemistry staining, we used Horseradish Peroxidase or Permanent Red based detection system (EnVision, DAKO).

### **Quantitative real-time PCR and microarray**

General real-time PCR was done as described (1, 2). For microarray, real-time PCR was done using 2X SuperArray RT qPCR Master Mix [RT<sup>2</sup> Profiler<sup>TM</sup> PCR Array System, SuperArray (PAHS-075A-02)] to quantify expression levels of 84 stem cell transcription factors.

### **Knockdown HIF-1 $\alpha$ expression and function**

We previously demonstrated that echinomycin specifically blocked *HIF1A* expression (6). T<sub>H</sub>17 cells and other T cell subsets were cultured with echinomycin (0.1nM) for 1-3 days as indicated. In other experiments, T<sub>H</sub>17 cells were transfected with shHIF-1 $\alpha$  expressing lentiviral vector. The lentiviral vector plenti6/V5-TOPO (Invitrogen) was modified by replacing CMV promoter with U6 promoter to drive shRNA-expressing cassette. This is followed by a pGK-driven EGFP cassette. The transfected cells expressed GFP. The core sequences of *HIF1 $\alpha$* -shRNA-1 and *HIF1 $\alpha$* -shRNA-2 were described (6).

### **Notch activation, inhibition and *BCL2* promoter assay**

To activate Notch, T cell subsets were transfected with GFP expressing lentiviral vector encoding an active form of Notch (the transmembrane and intracellular domains, comprising residues 1,704–2,531) Notch-IC cDNA (Notch IC) or control vector (6, 7). After different time points, T cell gene expression and function were analyzed on the basis of GFP expression. In other experiments, T cell subsets were cultured with  $\gamma$ -

Secretase Inhibitor, Z-Leu-Leu-Norleucine-CHO (0.5 nM, Calbiochem) as indicated. T cell phenotype and function were analyzed.

To detect the effects of HIF-1 $\alpha$  and Notch on *BCL2* promoter activity, the human Bcl-2 promoter sequence (-850 to +134, TSS as +1) was initially linked to GFP. HEK293 cells were transfected with viral vector encoding human *BCL2* promoter in conjunction with vector controls or vector containing cDNA encoding *HIF1A*, or *MYC* (genetic control), or *NOTCH-IC* cDNA. The promoter activity was measured by the green fluorescence intensity of transfected cells. Data were shown as the relative intensities. The intensity of control-GFP reporter is defined as 1.0.

### ***In vitro* T cell proliferation and division**

Primary or polarized T cells were stimulated with 2.5  $\mu$ g/mL anti-CD3 and 1.25  $\mu$ g/mL anti-CD28 for 4 days. T cell proliferation was defined by thymidine incorporation on day 3. In some experiments, prior stimulation, T cells were labeled with CFSE (8). T cell divisions were determined with flow cytometry analysis.

### **Apoptosis assay**

T cells were activated with anti-CD3 and anti-CD28 for 1-3 days. T cells were stained with Annexin V and 7-AAD. Apoptotic cells were analyzed by flow cytometry (9). In other experiments T cells were cultured with cisplatin (20  $\mu$ m). After 40 hours, cells were harvested Annexin V and 7-AAD staining.

### ***In vivo* T cell homeostatic expansion and persistence**

Primary T<sub>H</sub>17 cells or polarized HLA-A2<sup>+</sup> T cell subsets were mixed with HLA-A2<sup>-</sup> T cells, and injected into NSG mice. After transfusion, human T cells were recovered from different organs and analyzed by flow cytometry. In other experiments, primary T cells were injected into NSG mice. The mice were administrated with BrdU (1 mg/mice). After 24 to 48 hours, human T cell apoptosis and cycles were analyzed by flow cytometry in mouse spleen.

### ***In vivo* tumor formation**

To generate tumor associated antigen specific CD8<sup>+</sup> T cells, myeloid dendritic cells (DCs) were differentiated as we described (1, 2, 10). DCs were loaded with HLA-A2<sup>+</sup>Her2/neu<sup>+</sup> primary ovarian cancer lysate. HLA-A2<sup>+</sup>CD8<sup>+</sup> cells (10<sup>5</sup>/ml) were stimulated with tumor lysate-loaded DCs (5 x 10<sup>4</sup>/ml) in the presence of 5 ng/ml IL-2 and

IL-15 for two weeks. Tumor specific cytotoxicity of the resultant CD8<sup>+</sup> T cells was assessed using autologous primary HLA-A2<sup>+</sup>Her2/neu<sup>+</sup> ovarian cancer cells and HLA-A2<sup>+</sup> T2 cells bearing Her-2/neu peptides or matrix control as we previously described (1, 2, 10, 11). Autologous T<sub>H</sub>17 cells were also stimulated in an identical manner. The origin and cytokine profile of autologous T<sub>H</sub>17 cells were described above. HLA-A2<sup>+</sup>Her2/neu<sup>+</sup> ovarian cancer cells (1, 11) were subcutaneously injected into female NSG mice (6-8 weeks old, Jackson Lab, Bar Harbor, Maine) (1, 2). The CD8<sup>+</sup> T cells (6 x 10<sup>6</sup>) (1, 2) or/and autologous T<sub>H</sub>17 cells (6 x 10<sup>6</sup>) were injected intravenously into mice on day 10 after human tumor inoculation. Tumor volume was measured and calculated (1, 2). Animal protocol was approved by the Unit for Laboratory Animal Medicine of University of Michigan and was conducted in accordance with the National Institutes of Health's Guide for the Care and Use of Laboratory Animals.

## **Statistical analysis**

The Wilcoxon signed-rank test was used to determine pairwise differences and the Mann–Whitney U test was used to determine differences between groups.  $P < 0.05$  was considered as significant. All statistical analysis was done on Statistica software (StatSoft Inc.).

## Supplementary Figure 1

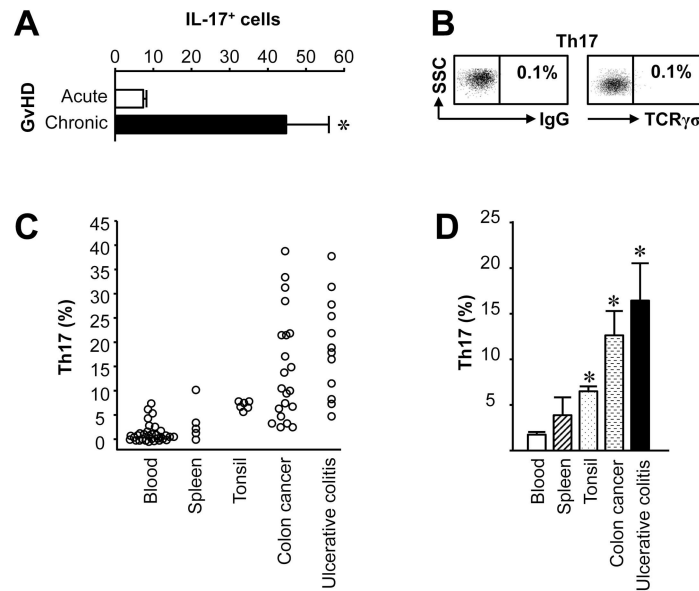

**Fig. S1.** T<sub>H</sub>17 cells in different tissues/organs. Case numbers, GvHD (6), blood (31), spleen (5), tonsil (6), colon cancer (21) and colitis (12). **(A)** IL-17<sup>+</sup> cells in oral mucosa tissues in patients with GvHD. Consecutive sections of oral mucosa biopsies were stained for IL-17. IL-17<sup>+</sup> cells were quantified in 5 high power fields. Results are expressed as the absolute mean numbers of IL-17<sup>+</sup> cells  $\pm$  SEM per field.  $P < 0.001$ , acute vs chronic. **(B)** Phenotype of IL-17<sup>+</sup> cells. IL-17<sup>+</sup> cells were T<sub>H</sub>17 cells, and did not express TCR $\gamma\delta$ . Gated on CD3<sup>+</sup>CD4<sup>+</sup>IL-17<sup>+</sup> cells. **(C, D)** T<sub>H</sub>17 cells in inflammatory tissues. T<sub>H</sub>17 cells were analyzed with flow cytometry in different tissues. Results are expressed as the actual percentage of T<sub>H</sub>17 cells in individual donors **(C)** and the mean percentage of T<sub>H</sub>17 cells  $\pm$  SD in CD4<sup>+</sup> T cells **(D)**.  $P < 0.001$ , compared to blood.

## Supplementary Figure 2

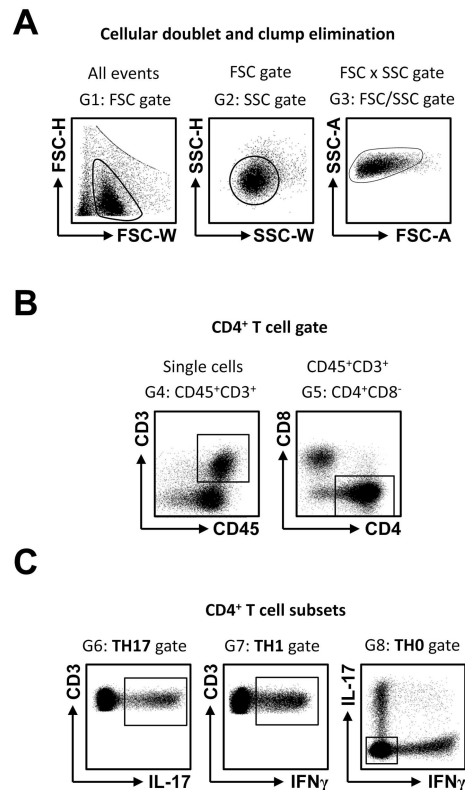

**Fig. S2.** Flow-based gating for primary T<sub>H</sub> cell subsets. Single cell suspension was subjected to staining for CD3, CD45, CD4, CD8, IL-17, and IFN $\gamma$ . Different T cell subsets were analyzed with a LSR II. **(A)** Single cells. In order to avoid cellular doublets and clumps, the cell suspension was initially analyzed on the basis of FSC and SSC in three dimensions with H, A, and W axes. Three gates (G1, G2, and G3) were accordingly utilized to exclude cellular doublets and clumps, and obtain real single cells. **(B)** CD4<sup>+</sup> T cells. Gates 4 and 5 were used to gate T cells, and CD4<sup>+</sup> T cells. **(C)** Primary T<sub>H</sub> subsets. Gates 6, 7 and 8 were used to gate T<sub>H</sub>17, T<sub>H</sub>1, and T<sub>H</sub>0 cells. All the flow-based phenotype and functional analyses were based on these gates.

## Supplementary Figure 3

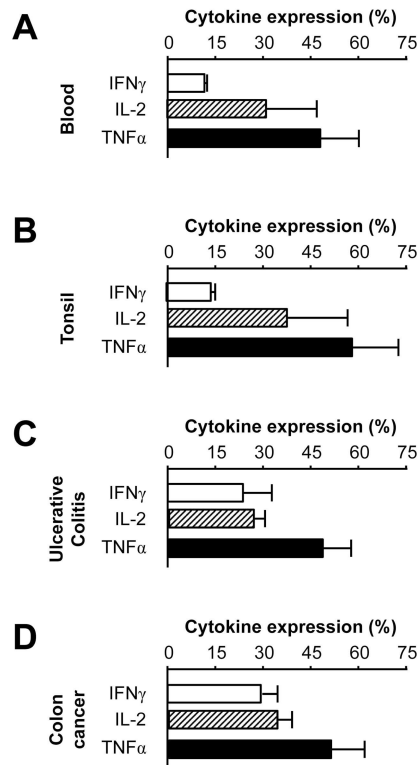

**Fig. S3.** Cytokine profile of primary T<sub>H</sub>17 cells. Effector cytokine profile of primary T<sub>H</sub>17 cells was analyzed with LSR II in blood (A), tonsil (B), ulcerative colitis (C) and colon cancer (D). Results are expressed as the mean percentage of cytokine expressing cells  $\pm$  SD in T<sub>H</sub>17 cells. Tonsil: 6; Blood: 31; Ulcerative colitis 12; Colon cancer, 21.



## Supplementary Figure 4

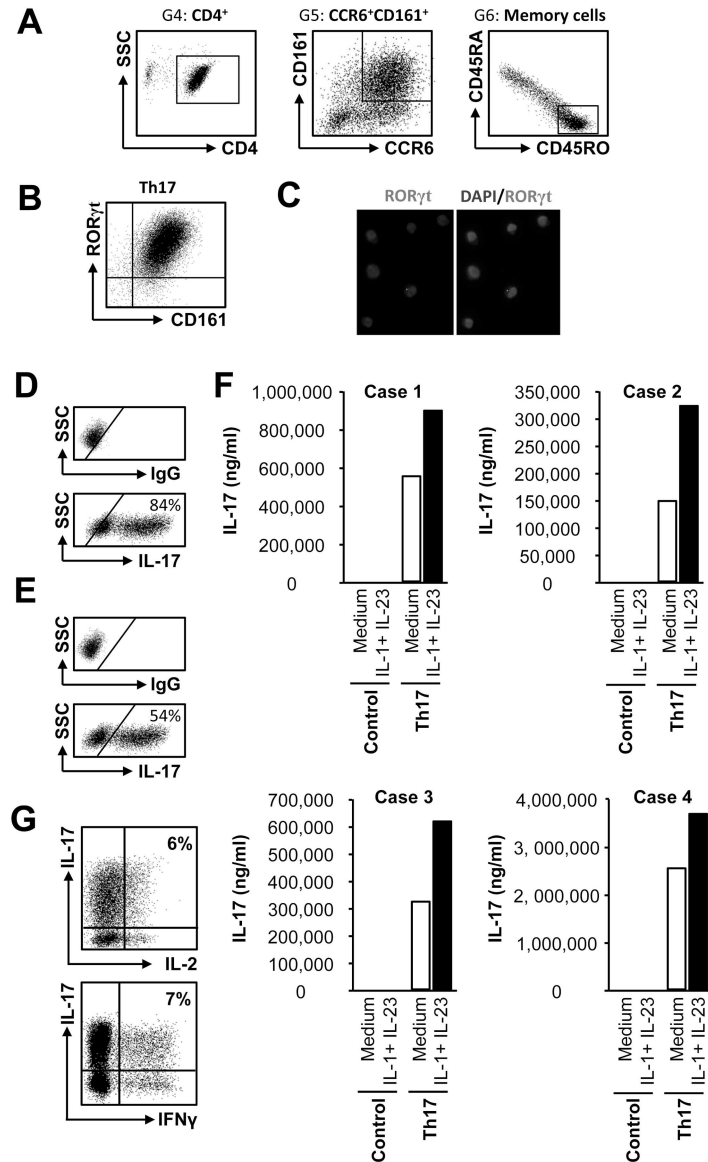

**Fig. S4.** Flow-based gating and sorting for T<sub>H</sub>17 cells. CD4<sup>+</sup> T cells were enriched with magnetic beads through negative selection. The cells were stained for CD3, CD4, CD45RA, CD45RO, CCR6, and CD161, and analyzed with a LSRII. Cellular doublets

and clumps were excluded with gates G1-3 (Fig. S2). **(A)** Surface phenotype of  $T_{H17}/T_{H17}$  precursor cells. Different gates were utilized to identify  $CD4^+$  T cells (G4),  $CCR6^+CD161^+CD4^+$  T cells (G5) and  $CCR6^+CD161^+CD4^+CD45RA^-CD45RO^+$  T cells (G6). **(B, C)** ROR expression in  $T_{H17}/T_{H17}$  precursor cells. We sorted  $CCR6^+CD161^+CD4^+CD45RA^-CD45RO^+$  T cells with high-speed sorter (LSR II). The cells were stained for ROR and CD161 expression, and analyzed with LSR II **(B)**. Or, the cytopsin slides were made with the sorted cells, and stained with anti-ROR, and analyzed with fluorescence microscope. ROR is localized in the nuclear. ROR expression (red), nuclear staining (DAPI, blue). **(D, E)** IL-17 expression by the sorted  $T_{H17}/T_{H17}$  precursor cells. The sorted  $CCR6^+CD161^+CD4^+CD45RA^-CD45RO^+$  T cells (G6) were maintained and polarized for 72 hours with IL-1 and IL-23. The resultant  $T_{H17}$  cells were termed as polarized primary  $T_{H17}$  cells. The cells were sampled for intracellular IL-17 staining. Based on the isotype control, more than 80% of the polarized primary  $T_{H17}$  cells expressed intracellular IL-17 **(D)**, and more than 50% of them expressed high levels of intracellular IL-17 **(E)**. **(F)** IL-17 production by the sorted  $T_{H17}/T_{H17}$  precursor cells. The sorted  $CCR6^+CD161^+CD4^+CD45RA^-CD45RO^+$  T cells (G6) were maintained and polarized for 72 hours with IL-1 and IL-23. The cells were sampled for measuring IL-17 in the supernatants.  $CCR6^+CD161^+CD4^+CD45RA^-CD45RO^+$  T cells released large amount of IL-17, and IL-1/IL-23 further enhanced their IL-17 production. Four cases are shown. **(G)**  $IFN\gamma$  and IL-2 expression in the polarized primary  $T_{H17}$  cells. The polarized primary  $T_{H17}$  cells were stained for intracellular IL-2 and  $IFN\gamma$ , and were analyzed with LSR II.

## Supplementary Figure 5

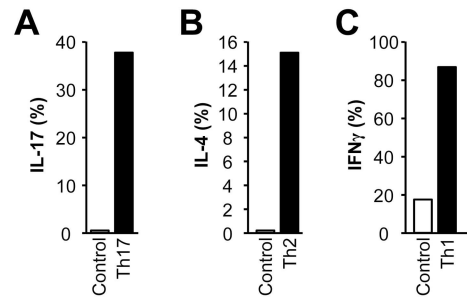

**Fig. S5.** Polarized T cell subsets. Naïve CD4<sup>+</sup> T cells were polarized to T<sub>H</sub>1, T<sub>H</sub>2, and T<sub>H</sub>17 as described. T<sub>H</sub> signature cytokines were analyzed with LSR II. Results were expressed as the percentage of signature cytokine expressing cells. One of 8 is shown.

## Supplementary Figure 6

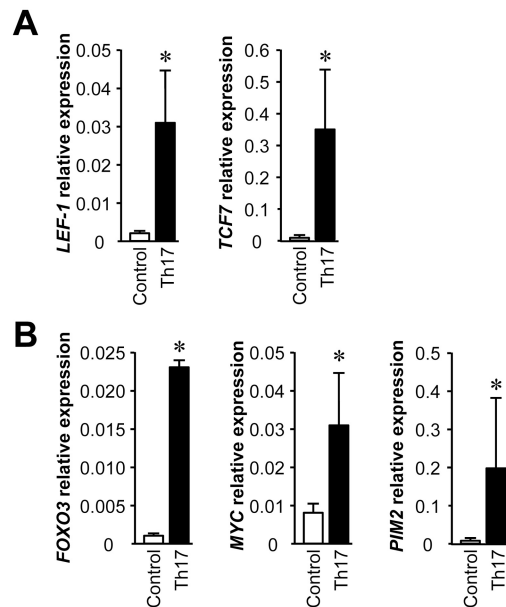

**Fig. S6.** T<sub>H</sub>17 cells express high levels of stem cell genes. Selective stem cell-associated gene expression was quantified by-real time PCR. **(A)** shows several Wnt/ $\beta$ -catenin signaling genes; and **(B)** shows other stem cell-associated genes including *MYC*, *FOXO3* and *PIM2*. Results are expressed as the mean relative values  $\pm$  SEM. n = 8, P < 0.05.

## Supplementary Figure 7

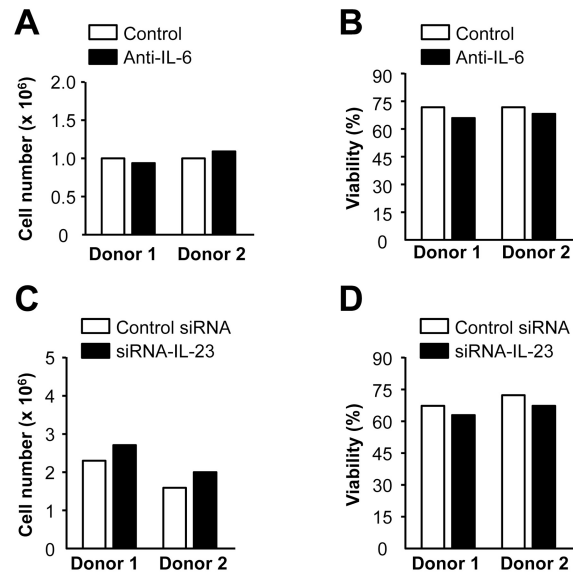

**Fig. S7.** Effects of IL-6 and IL-23 on  $T_H17$  cell apoptosis. Naïve T cells were polarized into  $T_H17$  cells in the presence of APCs. Anti-IL-6 was added into the culture (**A, B**) or IL-23 was blocked in APCs with siRNA-IL-23 (**C, D**). The total viable cells were recorded and the viability was calculated. Results are expressed as the mean values  $\pm$  SD. Two donors with duplicates.

## Supplementary Figure 8

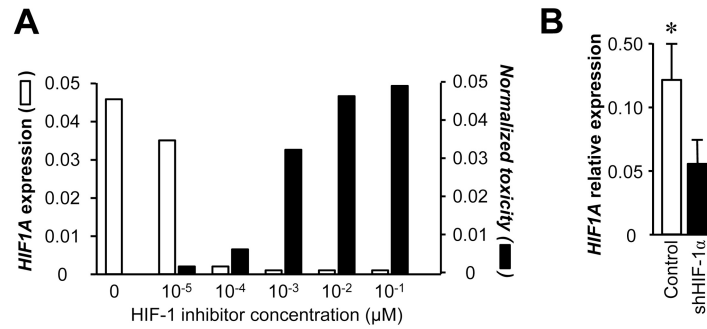

**Fig. S8.** HIF-1 blockade with echinomycin and shHIF-1 $\alpha$ . **(A)** Optimization of echinomycin concentration. T<sub>H</sub>17 cells were cultured with titrations of echinomycin. The toxicity was calculated based on the cell loss. 0.1 nM echinomycin resulted in potent reduction of HIF-1 expression (left scale) with negligible cell loss (right scale). This concentration was utilized in the experiments. **(B)** ShHIF-1 $\alpha$  efficiently blocked *HIF1A* expression. Two sets of shHIF-1 $\alpha$  were selected. After transfection, both efficiently blocked *HIF1A* expression in human primary T cells.

## Supplementary Figure 9

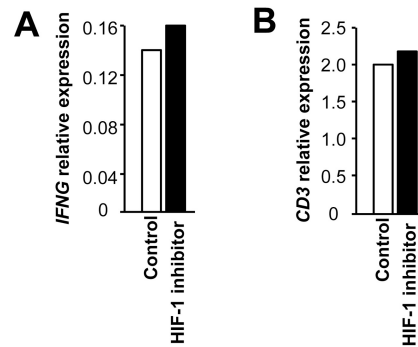

**Fig. S9.** The HIF-1 inhibitor echinomycin had no effects on the human *IFNG* and *CD3* expression in vivo. Human T cells were collected from mouse spleen as described in “Materials and Methods”. Human *IFNG* (A) and *CD3* (B) gene expression was quantified by real time PCR relative to human housekeeping genes (*GAPDH*). Results are expressed as the mean relative values  $\pm$  SEM.  $n = 3$ ,  $P > 0.05$ .

## Supplementary Figure 10

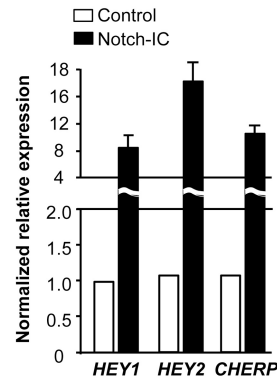

**Fig. S10.** Notch-IC activated Notch signaling gene expression.  $T_H17$  cells were transfected with Notch-IC. After 40 hours, Notch signaling gene expression was quantified by real-time PCR. Results are expressed as the mean relative values  $\pm$  SD.  $n = 4$ ,  $P < 0.001$  Notch-IC vs control.



## Supplementary References

1. I. Kryczek, L. Zou, P. Rodriguez, G. Zhu, S. Wei, P. Mottram, M. Brumlik, P. Cheng, T. Curiel, L. Myers, A. Lackner, X. Alvarez, A. Ochoa, L. Chen, W. Zou, B7-H4 expression identifies a novel suppressive macrophage population in human ovarian carcinoma. *J Exp Med* **203**, 871-881 (2006).
2. T. J. Curiel, G. Coukos, L. Zou, X. Alvarez, P. Cheng, P. Mottram, M. Evdemon-Hogan, J. R. Conejo-Garcia, L. Zhang, M. Burow, Y. Zhu, S. Wei, I. Kryczek, B. Daniel, A. Gordon, L. Myers, A. Lackner, M. L. Disis, K. L. Knutson, L. Chen, W. Zou, Specific recruitment of regulatory T cells in ovarian carcinoma fosters immune privilege and predicts reduced survival. *Nat Med* **10**, 942-949 (2004).
3. E. V. Acosta-Rodriguez, L. Rivino, J. Geginat, D. Jarrossay, M. Gattorno, A. Lanzavecchia, F. Sallusto, G. Napolitani, Surface phenotype and antigenic specificity of human interleukin 17-producing T helper memory cells. *Nat Immunol* **8**, 639-646 (2007).
4. I. Kryczek, M. Banerjee, P. Cheng, L. Vatan, W. Szeliga, S. Wei, E. Huang, E. Finlayson, D. Simeone, T. H. Welling, A. Chang, G. Coukos, R. Liu, W. Zou, Phenotype, distribution, generation, and functional and clinical relevance of Th17 cells in the human tumor environments. *Blood* **114**, 1141-1149 (2009).
5. I. Kryczek, A. T. Bruce, J. E. Gudjonsson, A. Johnston, A. Aphale, L. Vatan, W. Szeliga, Y. Wang, Y. Liu, T. H. Welling, J. T. Elder, W. Zou, Induction of IL-17+ T cell trafficking and development by IFN-gamma: mechanism and pathological relevance in psoriasis. *J Immunol* **181**, 4733-4741 (2008).
6. Y. Wang, Y. Liu, S. N. Malek, P. Zheng, Targeting HIF1alpha eliminates cancer stem cells in hematological malignancies. *Cell Stem Cell* **8**, 399-411 (2011).
7. N. Yamamoto, S. Yamamoto, F. Inagaki, M. Kawaichi, A. Fukamizu, N. Kishi, K. Matsuno, K. Nakamura, G. Weinmaster, H. Okano, M. Nakafuku, Role of Deltex-1 as a transcriptional regulator downstream of the Notch receptor. *J Biol Chem* **276**, 45031-45040 (2001).
8. S. Wei, I. Kryczek, L. Zou, B. Daniel, P. Cheng, P. Mottram, T. Curiel, A. Lange, W. Zou, Plasmacytoid Dendritic Cells Induce CD8+ Regulatory T Cells In Human Ovarian Carcinoma. *Cancer Res* **65**, 5020-5026 (2005).
9. I. Kryczek, A. Lange, P. Mottram, X. Alvarez, P. Cheng, M. Hogan, L. Moons, S. Wei, L. Zou, V. Machelon, D. Emilie, M. Terrassa, A. Lackner, T. J. Curiel, P. Carmeliet, W. Zou, CXCL12 and vascular endothelial growth factor synergistically induce neoangiogenesis in human ovarian cancers. *Cancer Res* **65**, 465-472 (2005).
10. T. J. Curiel, S. Wei, H. Dong, X. Alvarez, P. Cheng, P. Mottram, R. Krzysiek, K. L. Knutson, B. Daniel, M. C. Zimmermann, O. David, M. Burow, A. Gordon, N. Dhurandhar, L. Myers, R. Berggren, A. Hemminki, R. D. Alvarez, D. Emilie, D. T. Curiel, L. Chen, W. Zou, Blockade of B7-H1 improves myeloid dendritic cell-mediated antitumor immunity. *Nat Med* **9**, 562-567 (2003).

11. I. Kryczek, S. Liu, M. Roh, L. Vatan, W. Szeliga, S. Wei, M. Banerjee, Y. Mao, J. Kotarski, M. S. Wicha, R. Liu, W. Zou, Expression of aldehyde dehydrogenase and CD133 defines ovarian cancer stem cells. *Int J Cancer*, (2011).
